# Supplementary material
Source: PubMed Central journal article supplement (PMC5622868)
Supplement: 2016_159517-Disclosures_and_Contributions.pdf [file 2016_159517-Disclosures_and_Contributions.pdf]

Haematologica  
HAEMATOL/2016/159517  
Version 4

Acute lymphoblastic leukemia cells create a leukemic niche without  
affecting the CXCR4/CXCL12 axis

Bob de Rooij, Roel Polak, Lieke C.J. van den Berk, Femke Stalpers,  
Rob Pieters, and Monique L. den Boer

Disclosures: none

Contributions: Co-first authors B. de Rooij and R. Polak contributed equally to the study. B. de Rooij and R. Polak designed the study, performed the experiments, collected and analyzed all data, and wrote the paper. L. van den Berk performed the experiments shown in figure 2B and 2D. F. Stalpers isolated MSCs and leukemic cell samples. M.L. den Boer and R. Pieters analyzed data and wrote the paper.
